# Supplementary material for: GATA1 epigenetic deregulation contributes to the development of AML with NPM1 and FLT3-ITD cooperating mutations
Source: PubMed Central journal article supplement (PMC6756200; doi:10.1038/s41375-019-0399-7), 2019-02-12
Supplement: 41375_2019_399_MOESM1_ESM.pdf [file 41375_2019_399_MOESM1_ESM.pdf]

## **MATERIAL & METHODS**

### **Mouse strains and treatments**

Mice were housed by the “Service center of Preclinical Research” of Perugia and manipulations were performed according to the protocol approved by the Italian Health Ministry. To generate compound *Npm1/Flt3*-ITD mutant animals, we crossed conditional *NPM1*<sup>1</sup> (*Npm1*<sup>+TCTG</sup>) with constitutive *Flt3*-ITD (*Flt3*<sup>+ITD</sup>) mutant mice and used the Mx1Cre transgenic line to induce human *NPM1* mutation A expression in hematopoietic stem cells (HSC). Mice were treated through intra-peritoneal injections with a maximum tolerated dose of 5- azacytidine (5 mg/kg, every 3 days 5 doses) a demethylating agent.

### **Primary AML samples**

Samples were collected from AML patients diagnosed at the Perugia University Hospital after informed consent. The protocol was approved by ethical committee of the University of Perugia (AIRC protocol 2016-04, ERC protocol 2017-09).

### **Peripheral blood counts**

Mice were anesthetized with isoflurane followed by retro-orbital bleeding. Blood was taken into glass capillary tubes. Complete blood count was performed using an XE-2100 hematology automated analyzer (Dasit).

### **Flow Cytometry and Cell Sorting**

Bone marrow cells were stained with the following antibodies from eBioscience: FITC-anti-Gr1, PE-anti-Mac1, APC-anti-cKit, FITC-anti-B220, PE-anti-CD3, FITC-anti-Ter119, PE-anti-CD41; biotin-conjugated antibodies against CD3, CD4, CD8, B220, Ter119, Mac-1, Gr-1, Sca-1, IL7R, CD5, phycoerythrin (PE)-Cy5-conjugated streptavidin, allophycocyanineFluor-780-conjugated

anti-c-Kit, FITC-conjugated anti-CD41, allophycocyanin-conjugated anti-FCγR, PE/CY7-conjugated anti-CD105 (BioLegend), and PE-conjugated anti-CD150 (BD Biosciences). Multiparameter flow cytometry was used to define and analyze the HSC compartment, including long-term hematopoietic stem cells (LT-HSC; lin-Sca-1+c-kit+ CD34-Flt3-), short-term HSC (ST-HSC; lin-Sca-1+c-kit+CD34+Flt3-) and multipotent progenitors (MPP; lin-Sca-1+c-kit+CD34+Flt3+). In addition, the myeloid progenitors' population was included and analyzed as common myeloid progenitors (CMPs Lin-Sca-1-cKit+CD34+FcγRII/IIIlo), granulocyte/monocyte progenitors (GMP Lin-Sca-1-cKit+CD34+FcγRII/IIIhi) and common megakaryocyte-erythroid progenitor (MEP Lin-Sca-1-cKit+CD34-FcγRII/IIIlo) populations. Cell acquisition and analysis were performed on a NAVIOS Beckman Coulter flow cytometer. Sorting experiments were performed using the FACS Aria III cell sorter. Gates were drawn to exclude nonviable cells and debris. Part of the flow cytometry data was analyzed with FlowJo software (Tree Star, Ashland, OR).

### **In vitro hematopoietic colony-forming assay**

For in vitro replating assays, a total of 105 BM cells were plated in duplicate in MethoCult M3434 (StemCell Technologies) containing rm SCF, rm IL-3, rh IL-6, rh EPO and grown at 37°C with 5% CO<sub>2</sub>. All colonies were quantified after 10-12 days of growth for detection of BFU-E, CFU-GM, CFU-GEMM in BM.

### **Cloning, Infection and Transplant**

*GATA1* mouse cDNA was cloned into the *pSico* vector<sup>1</sup>, a gift from Tyler Jacks (Addgene plasmid #11578), containing loxP sites and GFP reporter protein allowing conditional *GATA1* expression.

HEK293T cell line was transfected with pSico/GATA1 vector with Lipofectamine and viral supernatant was used to infect Lin- BM cells. Infected cells were cultured in StemSpan serum-free medium add with 100 ng/ml mouse KIT ligand, 20 ng/ml human thrombopoietin, 100 ng/ml human

FLT ligand. Lethally irradiated mice were transplanted with infected cells in a range of  $4 \times 10^5$  cells/mouse and sacrificed two months after transplantation for GATA1 re-expression and flow cytometry analysis.

### **Immunoblotting analysis**

Gata1 protein was detected by WB analysis with an anti-rat primary antibody against GATA-1 (N6) clone sc-265 (Santa Cruz). Mouse  $\alpha$ -tubulin antibody was used as control (Sigma).

### **qRT-PCR analysis**

RNA was extracted with Trizol reagent and reverse-transcribed with PrimeScript RT Master Mix (Diatechlalbine). Quantitative reverse transcriptase-PCR (qRT-PCR) was performed using SYBR Green Premix Ex Taq II (Diatechlalbine) and a 7900 Fast Real-Time PCR System (Applied Biosystems, Foster City, CA). PCR amplifications were performed by incubation at 95°C for 10 minutes, followed by 40 cycles of incubations at 95°C for 15 seconds and 60°C for 1 minute. Data were analyzed according to the comparative Ct method and normalized to glyceraldehyde-3-phosphate dehydrogenase expression levels within each sample. The 2-DDCt method was used to calculate relative expression levels of target genes. Data analysis was performed using the SDS Enterprise Database (Applied Biosystems). The following primers were used to quantify *GATA1* mouse expression: GATA1-F 5'-CGTCATACCACTAAGGTGGCTGAAT-3'; GATA1-R 5'-GTGGAATCTGATGGTGAGGACA-3' in comparison with endogenous *GAPDH*: GAPDH-F 5'-TGTGTCCGTCGTGGATCTGA-3'; GAPDH-R 5'-CCTGCTTCACCACCTTCTTGA-3'. The following primers were used to quantify *GATA1* human expression: hGATA1F 5'-CTGTCCCCAATAGTGCTTATGG-3'; hGATA1R 5'-GAATAGGCTGCTGAATTGAGGG-3' in comparison with endogenous *GAPDH*: hGAPDH-F 5'-ATGGGGAAGGTGAAGGTCG-3'; hGAPDH-R 5'-GGGGTCATTGATGGCAACAATA-3'.

## **Methylation analysis by Bisulfite Treatment and qRT-PCR**

We used the CpG Island searcher software to identify CpG islands within the mouse *GATA1* gene promoter region (<http://urogene.org/cgi-bin/methprimer/methprimer.cgi>). Methylation analysis was performed using two different approaches following a common sodium bisulfite treatment of genomic DNA. In the first approach, sodium bisulfite-treated gDNA was PCR amplified, PCR products were cloned into the pCR2.1 TOPO vector (Invitrogen), and individual clones were sequenced. Primer sets amplified a 235-bp product located at the same genomic region of the mouse *Gata1* promoter (forward primers from -768 to -744 and reverse primers from -534 to -560). To explore the methylation status of the human GATA1 promoter we generated primer sets that amplified a 216 bp product within the described promoter region<sup>2</sup>. Gene-specific DNA methylation was determined with a OneStepqMethyl-Lite kit (Zymo Research, Irvine, CA, USA) and specific methyl primers and probes (PrimeTime qPCR Assay Integrated DNA technologies). Primers spanned a DNA region that is 350 bp and contains two MSRE sites. In the second approach, 20 ng of global DNA was incubated in the presence (test reaction) or absence (reference reaction) of methyl sensitive restriction enzymes (5 U each) at 37°C for 2 h, followed by real-time reverse transcription PCR (RT-PCR) as described in the manufacturer's instructions. Percentage methylation was calculated using the formula  $100 \times 2^{-\Delta Ct}$ , where  $\Delta Ct$  is the average Ct value from the test reaction minus the average Ct value from the reference reaction. Percentage methylation is relative to each experiment.

## **Gene expression profiling**

Mouse gene expression profiles (GEPs) were generated using an Affimetrix probe MoGene-2\_0-st-v1. Expression levels were processed using standard methods of normalization and significance analysis with R/Bioconductor<sup>3,4</sup>. The gene ontology analysis was performed in R/Bioconductor and represented with tree-map plots, including enrichment in "biological process", "cellular

component", "molecular function" obtained with genes with p-value < 0.05 and |fold change| < 1.5 as standard. Finally, the pathway analysis was done with R/Bioconductor querying KEGG 1, to select only the enriched pathways (p-value < 0.05 and |fold change| < 1.5) and Reactome 2 selecting the most targeted pathways, considering only differential expressed genes.

### **Accession Numbers**

mRNA expression profiles data (GEO accession GSE16015) can be accessed in the Gene Expression Omnibus.

### **Statistical analysis**

For survival studies, we used the method of Kaplan and Meier with a follow-up of 20 mice per genotype. For studies in which animals are sacrificed for analysis at different ages, we studied 4 mice per group per time point, and analyzed the data using analysis of variance. For *in vitro* assays, utilized a standard Students t-test. Statistical analysis was carried out on at least three independent experiments.

### **SUPPLEMENTARY REFERENCES**

1. Ventura A, Meissner A, Dillon CP, McManus M, Sharp PA, Van Parijs L, Jaenisch R, Jacks T. Cre-lox-regulated conditional RNA interference from transgenes. *Proc Natl Acad Sci U S A*. 2004; 101(28):10380-5.
2. Nicolis S, Bertini C, Ronchi A, Crotta S, Lanfranco L, Moroni E, *et al*. An erythroid specific enhancer upstream to the gene encoding the cell-type specific transcription factor GATA-1. *Nucleic Acids Res* 1991 Oct 11; 19(19): 5285-5291.

3. Kanehisa M, Goto S. KEGG: kyoto encyclopedia of genes and genomes. *Nucleic Acids Res* 2000;28(1):27-30.

4. Fabregat A, Sidiropoulos K, Garapati P, Gillespie M, Hausmann K, Haw R, *et al.* The Reactome pathway Knowledgebase. *Nucleic Acids Res* 2016;44(D1): D481-7

## SUPPLEMENTARY FIGURE LEGEND

### Figure S1. Phenotype of *Npm1/Flt3-ITD* leukemic mice.

(A) (i) Bone marrow cytopsin (60 x magnification) from a representative healthy wild-type (WT) and a leukemic mouse displaying blasts infiltration. (ii) Immunohistochemistry staining of NPM1 in blasts showing aberrant expression of NPM1 in the cytoplasm (60 x magnification). (B) (i) Representative flow-cytometric analysis showing the gating of Gr1/Mac1, c-Kit<sup>+</sup> and Gr1<sup>+</sup>/c-Kit<sup>+</sup> cells in the BM of leukemic mice. (ii) Different percentage of immature and mature myeloid cells in the four different genotypes of the diseased mice. The more immature blasts (c-Kit<sup>+</sup>) were two-fold higher in *Npm1*<sup>TCTG/TCTG</sup>;*Flt3*<sup>+/ITD</sup> (n=14), *Npm1*<sup>+/TCTG</sup>;*Flt3*<sup>ITD/ITD</sup> (n=4) and *Npm1*<sup>TCTG/TCTG</sup>;*Flt3*<sup>ITD/ITD</sup> (n=6) mice compared to *Npm1*<sup>+/TCTG</sup>;*Flt3*<sup>+/ITD</sup> (n=4) (20.2±12.8%, 21.28±2.7% and 17.08±5.6% vs 10.7±7.5%, respectively). In *Npm1*<sup>+/TCTG</sup>;*Flt3*<sup>+/ITD</sup> leukemic BM samples the percentage of Gr1<sup>+</sup>/c-Kit<sup>+</sup> cells was lower than in other diseased genotypes (3.4±2.7% vs 8.6±4.4%, 7±2.2% and 7±2.6). More differentiated Gr1<sup>+</sup>/Mac1<sup>+</sup> cells were reduced in double mutated BM samples that were *Flt3*-ITD homozygous compared to heterozygous, regardless the *NPM1* mutation allelic burden (29.9±3.5% and 30.8±7.2% vs 41.3±28.5% and 40.2±20%, respectively). (iii) c-Kit<sup>+</sup>/Gr1<sup>+</sup>Mac1<sup>+</sup> cells ratio in the spleen of leukemic mice (n = 4 to 15 per genotype).

\*  $p < 0.05$ , \*\*  $p < 0.01$ ; unpaired t-test with Welch's correction.

### **Figure S2. Bone marrow B cell and B cell progenitors.**

(A-C) Representative FACS plot (left panels) and relative frequency and number (right panels) of total B cell (A), PreproB and ProB (B), PreB, Immature and Recirculating (C) BM cells ( $n = 4$  per group) in wild type and  $Npm1^{TCTG/+};Flt3^{+ITD}$  mice.

\*\*  $p < 0.01$ , \*\*\*  $p < 0.001$ ; unpaired t-test with Welch's correction

### **Figure S3. Hematopoietic changes in pre-leukemic $Npm1^{+TCTG};Flt3^{+ITD}$ mice.**

(A) Significant differences in platelets number (PLT) in  $Npm1^{+TCTG};Flt3^{+ITD}$  preleukemic mice compared to  $Npm1^{+TCTG};Flt3^{+/+}$ ,  $Npm1^{+/+};Flt3^{+ITD}$  and  $Npm1^{+/+};Flt3^{+/+}$  littermate groups ( $n = 12$  to 20 per genotype). (B) Significant higher spleen-to-body weight ratios in  $Npm1^{+TCTG};Flt3^{+ITD}$  mice compared with  $Npm1^{+TCTG}$ ,  $Flt3^{+ITD}$  and wild type littermate groups ( $0.017 \pm 0.012$  vs  $0.008 \pm 0.002$ ,  $0.005 \pm 0.0008$ ,  $0.005 \pm 0.001$  respectively) ( $n = 4$  to 15 per genotype). (C) (i-ii) Flow-cytometric analysis of immature erythroid and megakaryocytic compartments, including megakaryocyte progenitor (MkP), pre-CFU-E, CFU-E, proEry, pre-megakaryocyte-erythrocyte progenitors (PreMegE) and Ter119 population ( $n = 4$  to 9 per genotype). (iii) The graph represents the mean number of the myeloid clonogenic progenitor cells obtained using clonogenic assays of three independent experiments.

\*  $p < 0.05$ , \*\*  $p < 0.01$ , \*\*\*  $p < 0.001$ ; unpaired t-test with Welch's correction.

### **Figure S4. Transcriptional network analysis in total BM cells.**

Red nodes represent products of upregulated genes and blue nodes represent products of downregulated genes in  $Npm1^{TCTG/TCTG};Flt3^{+ITD}$  leukemic mice compared to wild-type controls.

**Figure S5 Transcriptional network analysis in lineage depleted bone marrow cells.**

Red nodes represent products of upregulated genes and blue nodes represent products of downregulated genes in *Npm1<sup>TCTG/TCTG</sup>;Flt3<sup>+ITD</sup>* lineage depleted BM cells from leukemic mice compared to wild-type controls.

**Figure S6. The extent of GATA1 deregulation correlated with the degree of the myeloid phenotypic changes in mutant BM cells**

(A) (i) *Npm1<sup>+TCTG</sup>;Flt3<sup>+ITD</sup>* samples were binarized into low and high GATA-1 mRNA expression (n = 4) (ii) GATA1 protein expression in *Npm1<sup>+TCTG</sup>;Flt3<sup>+ITD</sup>* samples relative to high and low mRNA expression (n = 4). (B) (i-iv) Significant differences in WBC counts, MPP and GMP compartments in the BM of *Npm1<sup>+TCTG</sup>;Flt3<sup>+ITD</sup>* mice according to GATA1 mRNA expression levels. Percentage of GR1+Mac1+ cells in the spleen of *Npm1<sup>+TCTG</sup>;Flt3<sup>+ITD</sup>* mice displaying either low or high GATA1 mRNA levels (n = 12 to 16 per genotype).

\* p<0.05, \*\* p<0.01, \*\*\*p<0,001; unpaired t-test with Welch's correction

**Figure S7. Cellular effects of enforced expression of GATA1 in pre-leukemic *Npm1<sup>+TCTG</sup>;Flt3<sup>+ITD</sup>* cells**

(A) An inducible GATA1 lentiviral system lead to GATA1 mRNA expression in the BM of mice transplanted with *Npm1<sup>+TCTG</sup>;Flt3<sup>+ITD</sup>* LSK (n = 4 to 12). (B) (i) Representative FACS plot of hematopoietic stem cells (LT-HSC, ST-HSC and MPP) and progenitor populations (CMP, GMP, and MEP) in MOCK and GATA1 infected mice (n = 10 to 16). (ii) Frequency of MEP populations in MOCK and GATA1 infected mice. Values are derived from MOCK (n=10) and GATA1 (n=16) infected mice. Data represent the mean ± SD. (C) (i) Representative spleen size and average



spleen/body weights ratio (lower histogram) of MOCK (n=10) and GATA1 (n=16) infected mice. The data are presented as mean  $\pm$  SD. (ii) Representative FACS plot of mature (Gr1-Mac1) and immature (Gr1-c-Kit) myeloid cells infiltrating the spleen of MOCK and GATA1 infected mice; (iii-iv) histograms showing average frequency of Gr1-Mac1 and Gr1-c-Kit cells according to the gating strategy on the facs plot.

\* p<0.05, \*\* p<0.01; unpaired t-test with Welch's correction

**Figure S8. Cellular and molecular changes in *Npm1<sup>+TCTG</sup>;Flt3<sup>+ITD</sup>* mice treated with AZA**

(A) Western blot analysis of GATA1 expression in *Npm1<sup>+TCTG</sup>;Flt3<sup>+ITD</sup>* BM cells cultured in presence or absence of the proteasome inhibitor MG132. (B) GATA1 mRNA expression in the BM of AZA treated mice (n = 5). (C) (i-ii) Representative FACS plot of MEP and Ter119 cells in the BM of AZA treated mice (n = 5 to 12 per treatment group).

\* p<0.05, \*\* p<0.01; unpaired t-test with Welch's correction

**Figure S9. *GATA1* mRNA expression analysis of an independent AML database**

(A) Analysis of GATA1 levels in AML samples including both normal and complex karyotype (n = 20 to 179 samples for each genetic group indicated in the figure). (B) Analysis of GATA1 levels in AML samples with normal karyotype (NK) only.

\* p<0.05 comparing all the groups; one-way ANOVA analysis

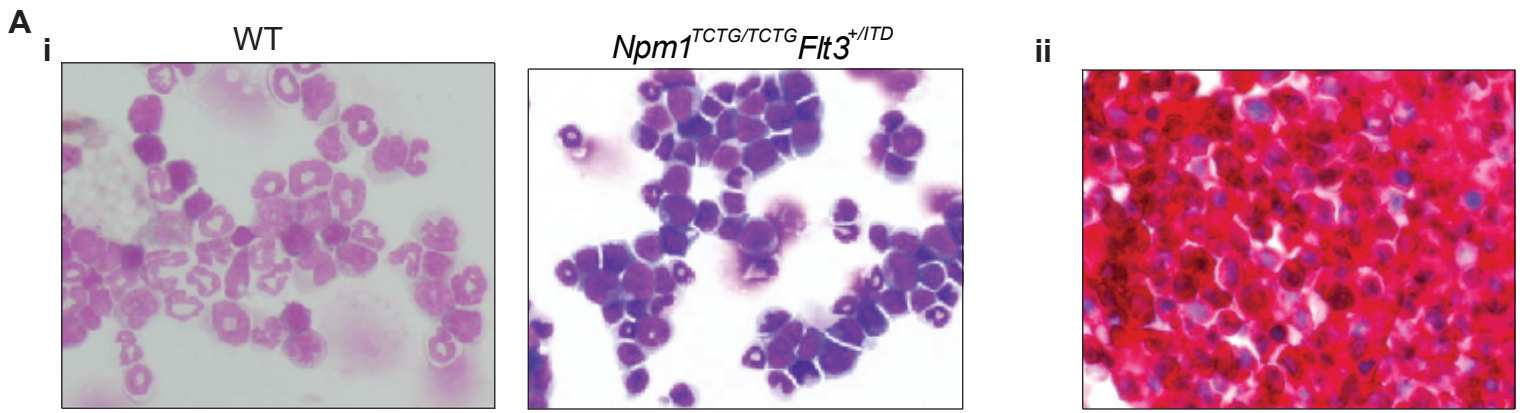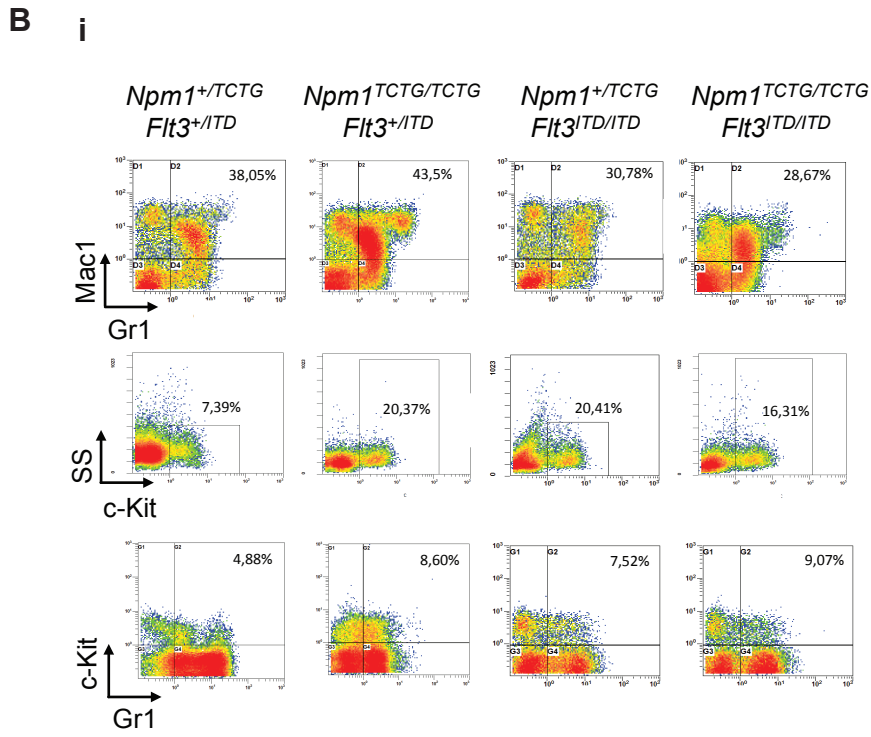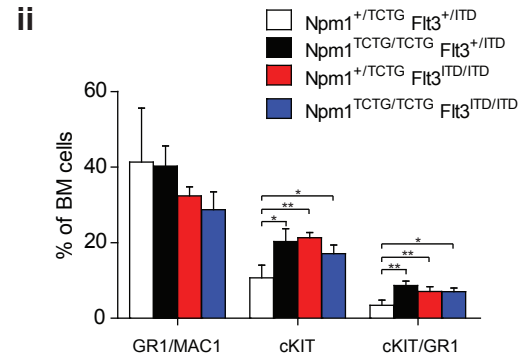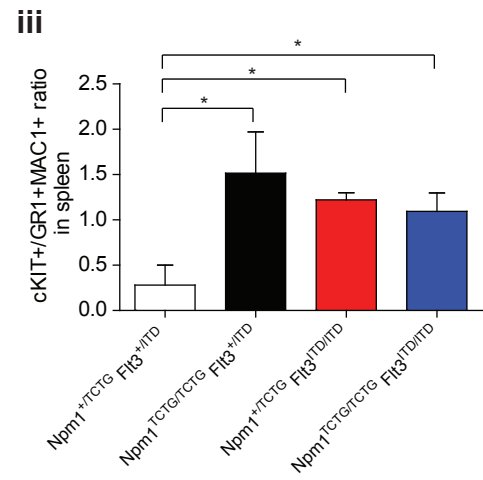

Figure S1: Sportoletti et al.

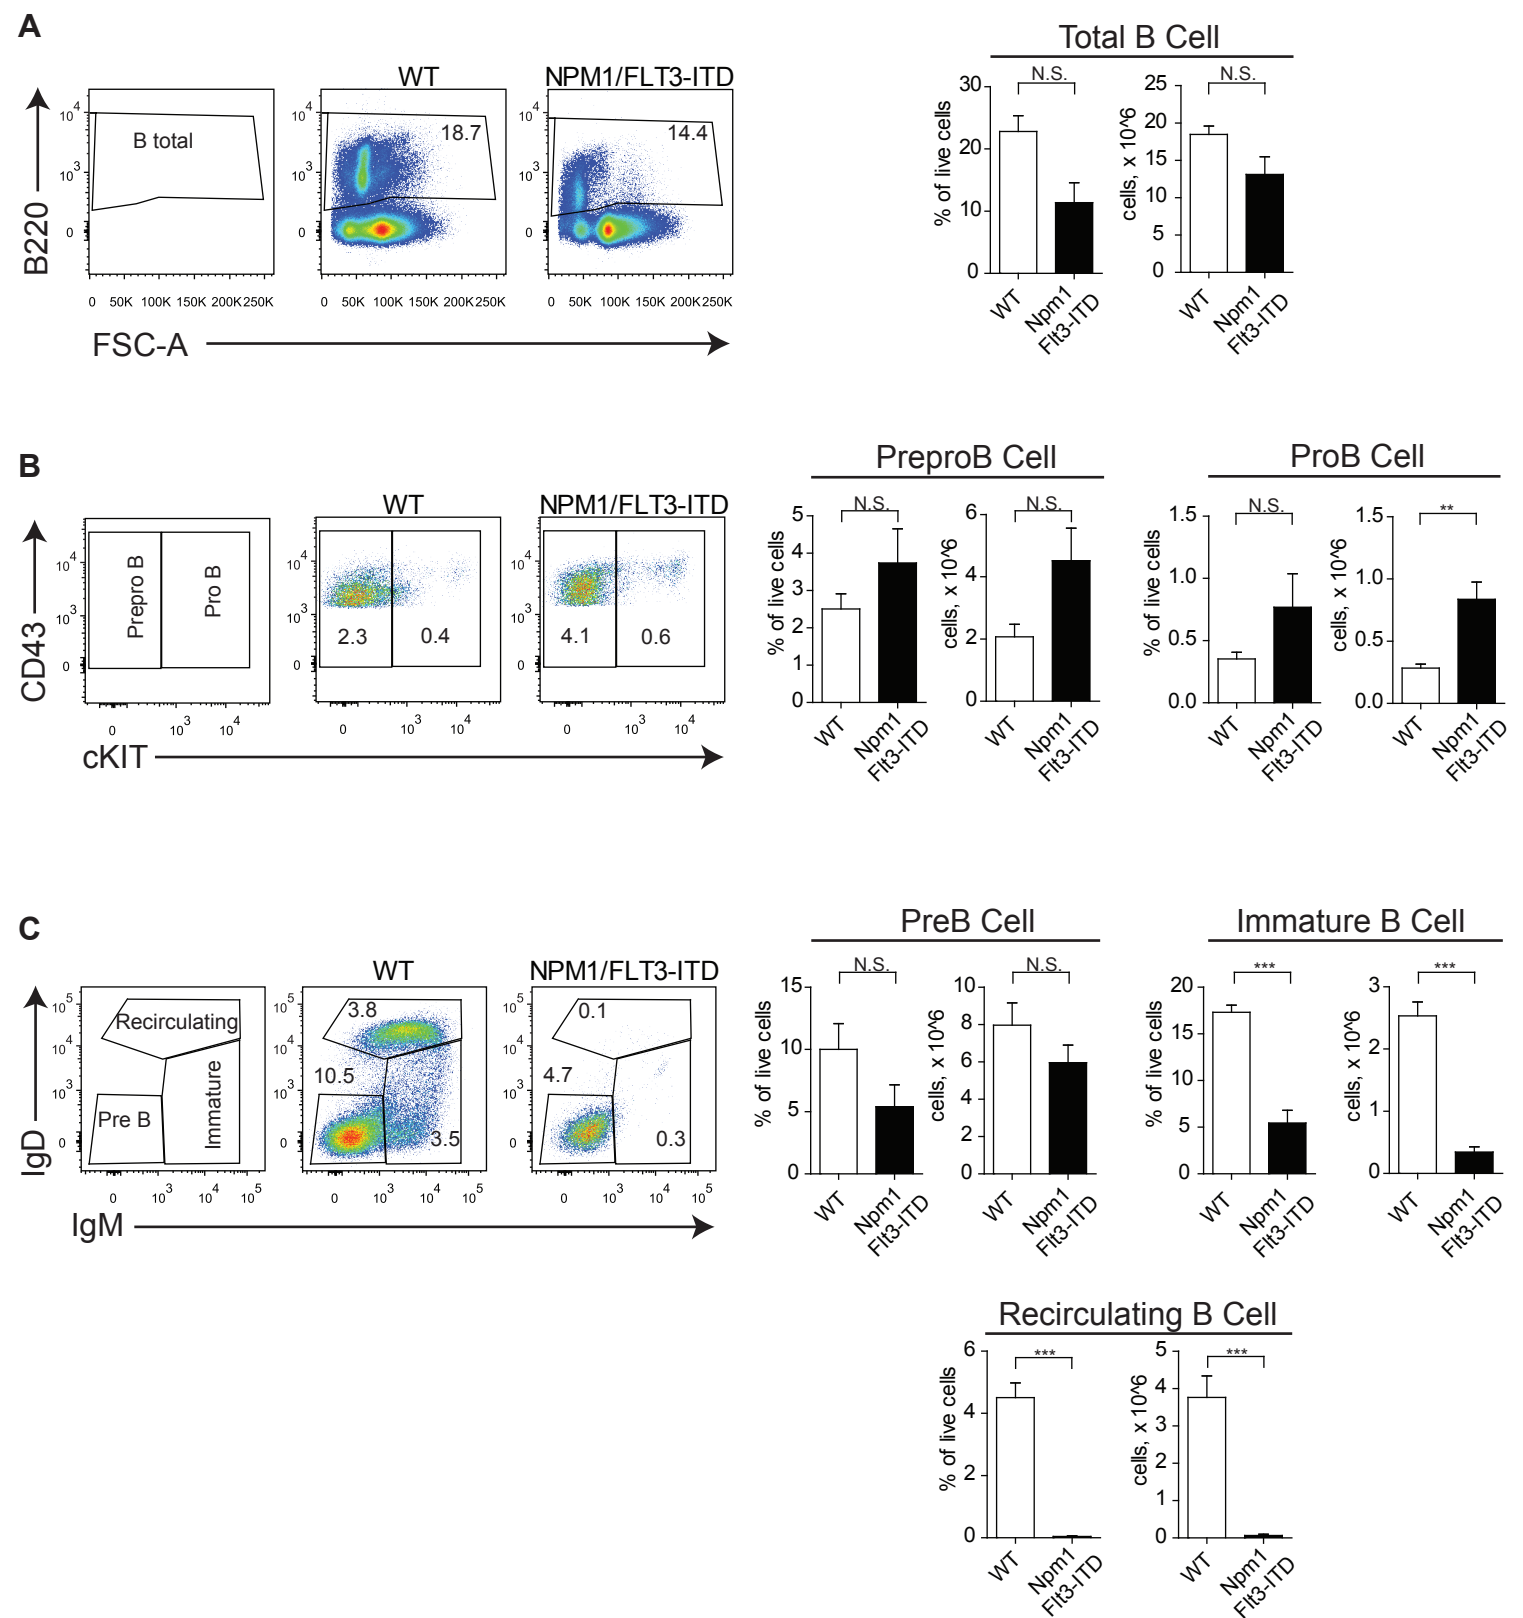

Figure S2: Sportoletti et al.

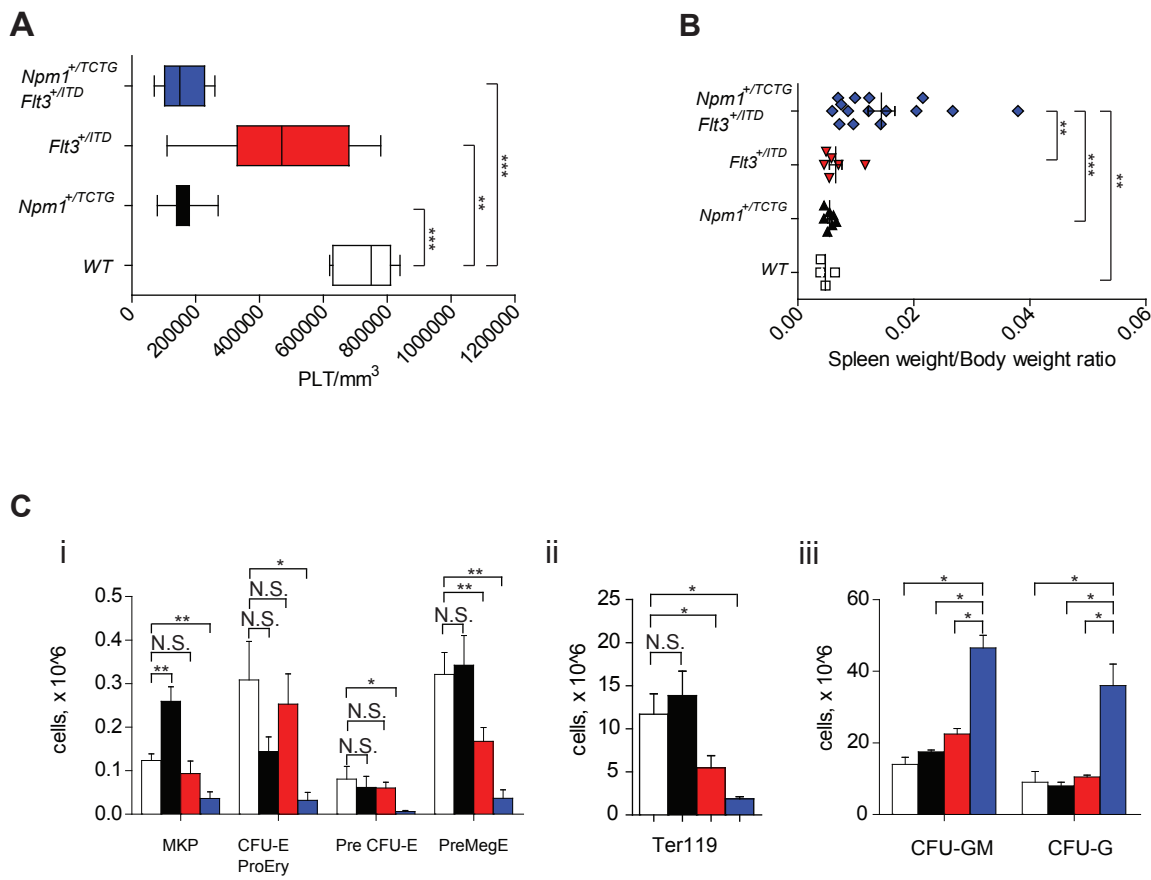

Figure S3: Sportoletti et al.



# Factors involved in Megacayocyte and platelet production

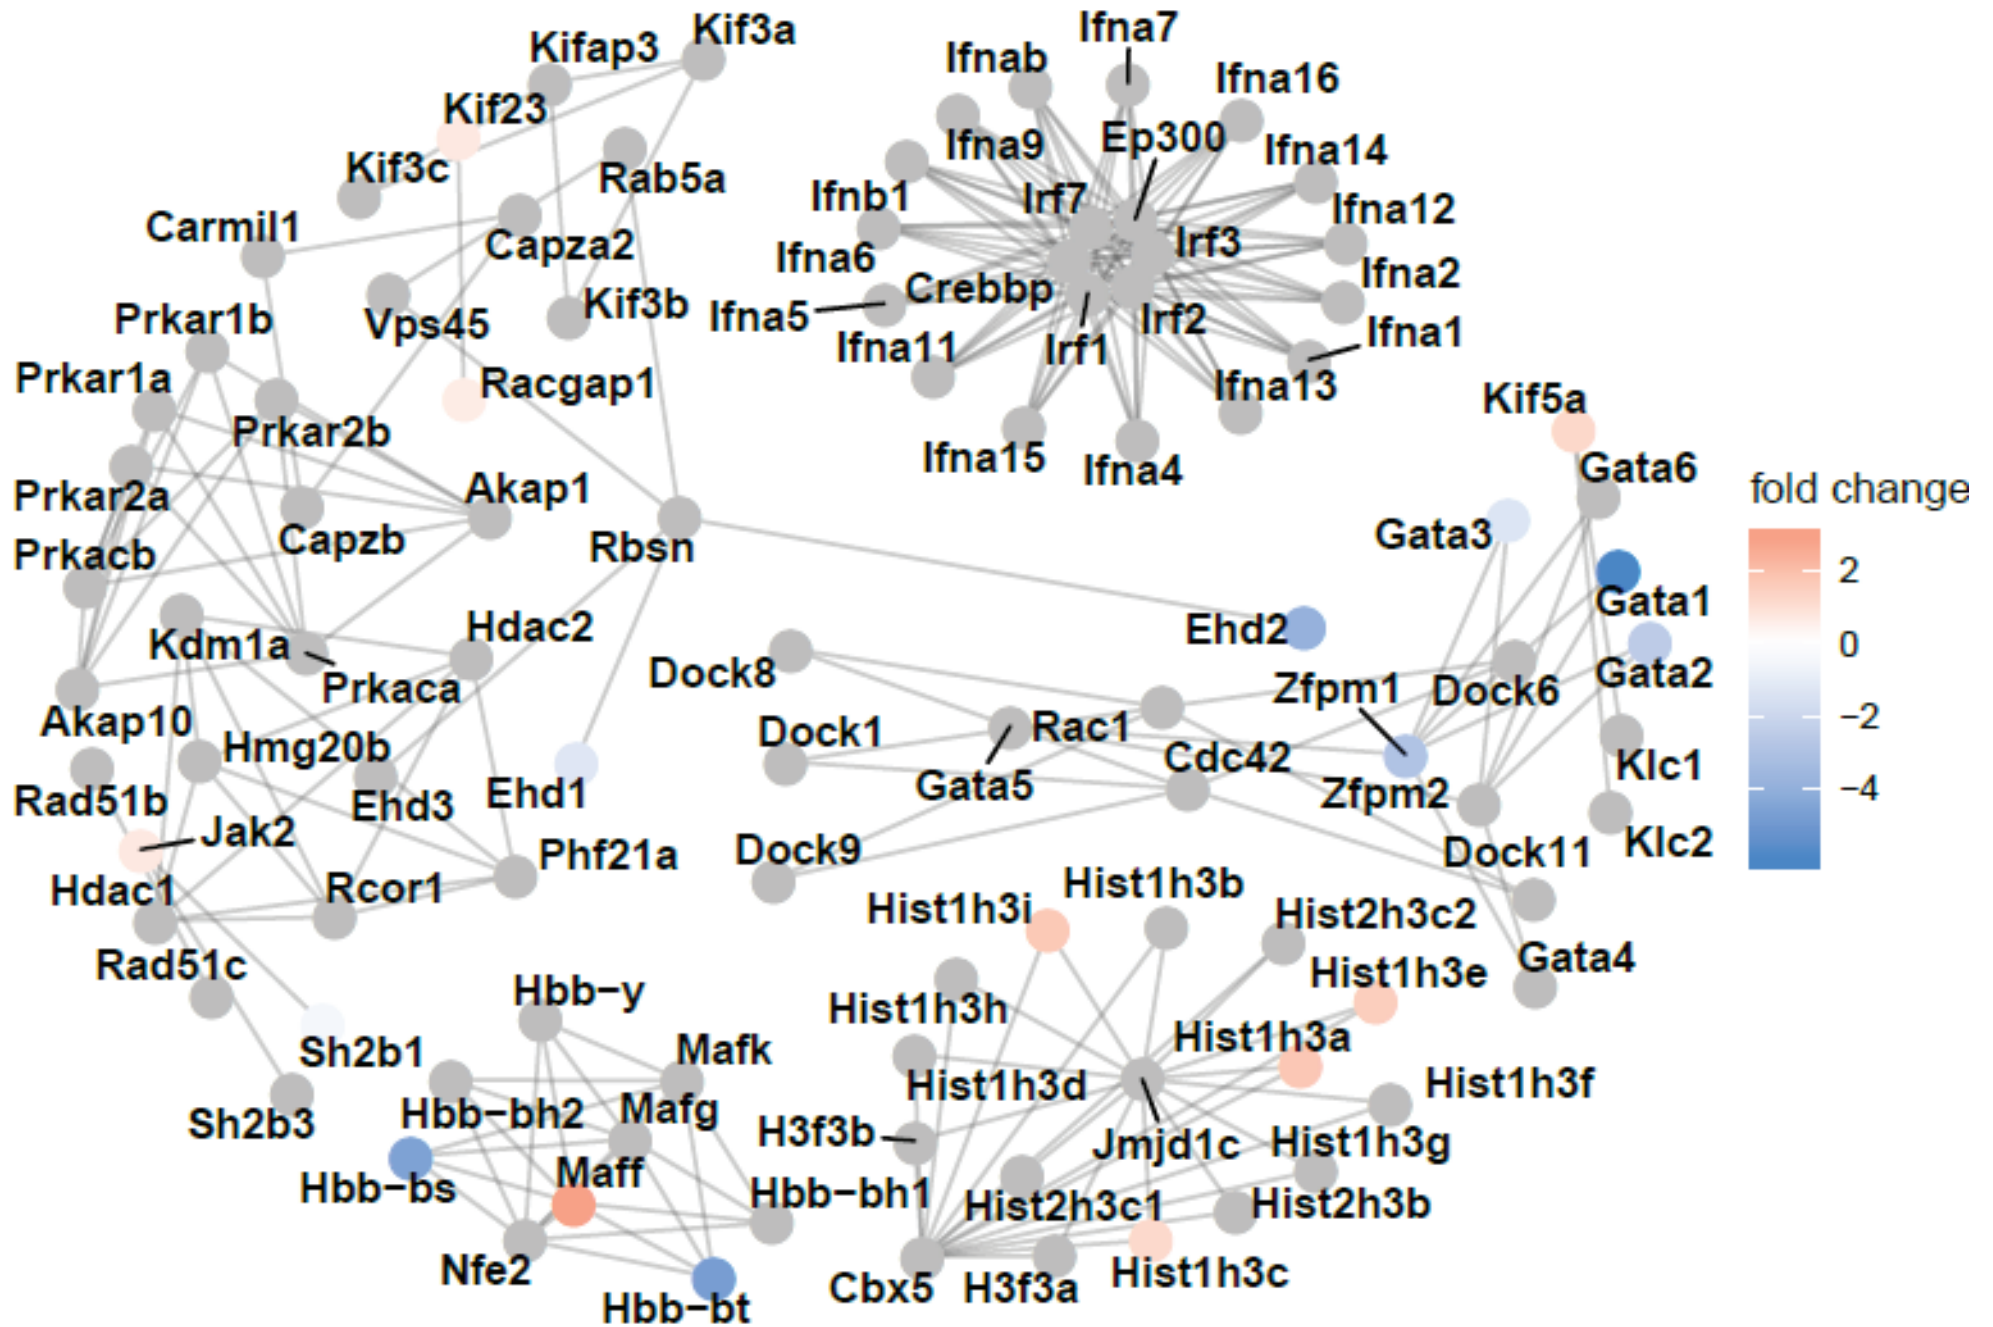

Figure S5: Sportoletti et al.

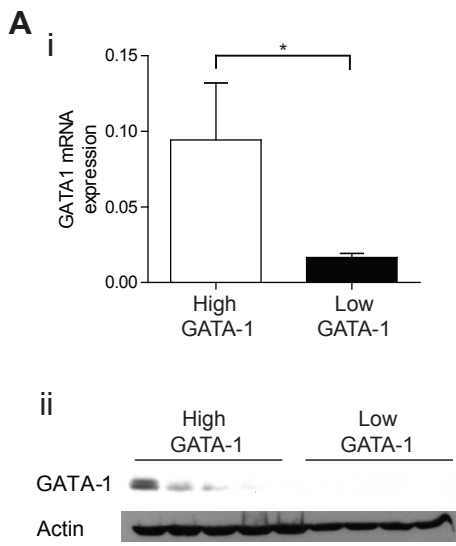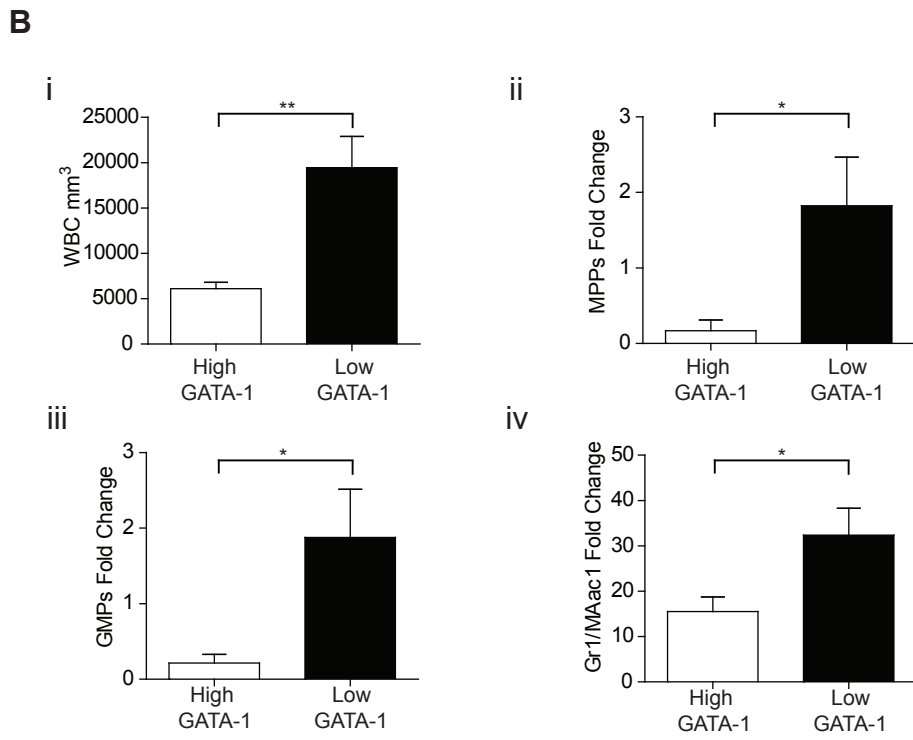

Figure S6: Sportoletti et al.

**A**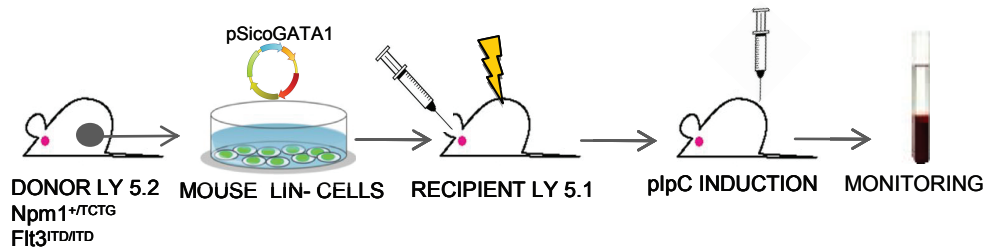**B**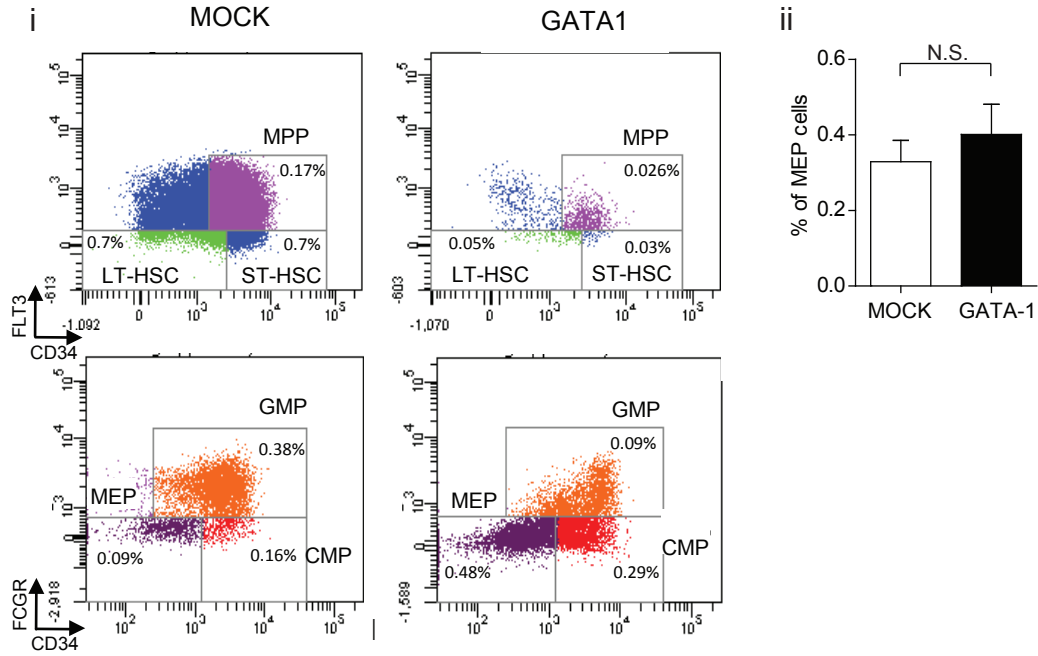**C**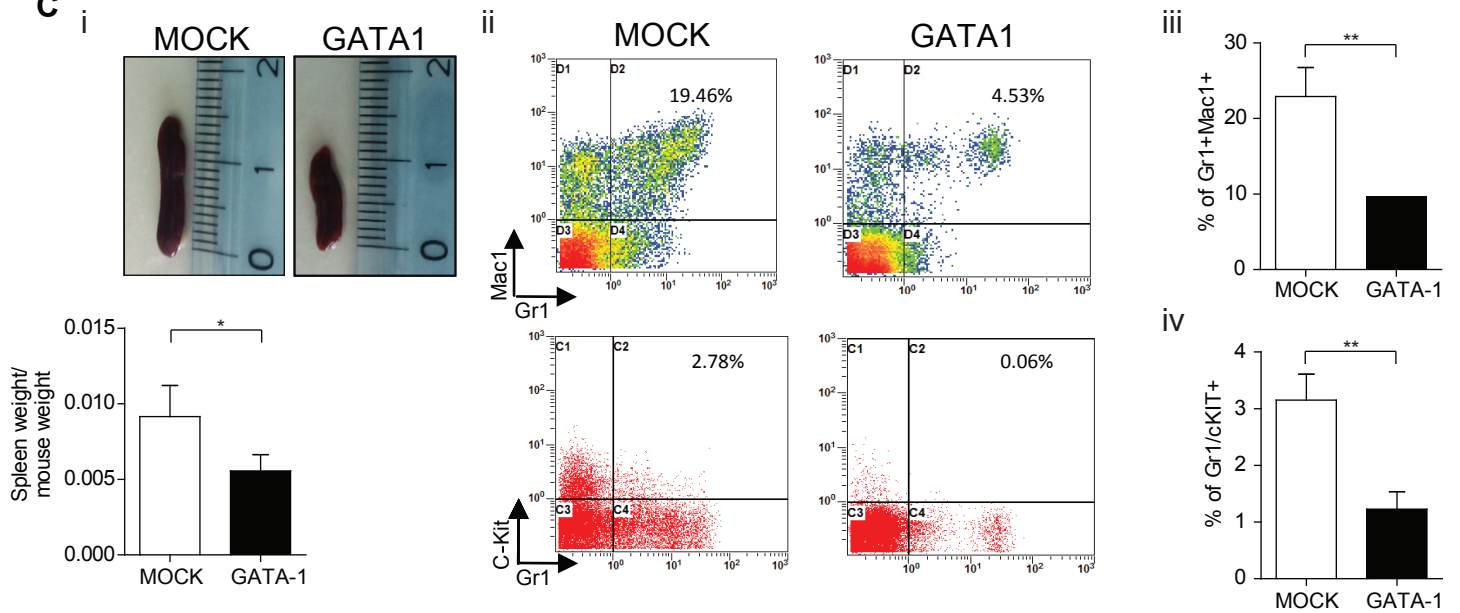

**Figure S7: Sportoletti et al.**



**A**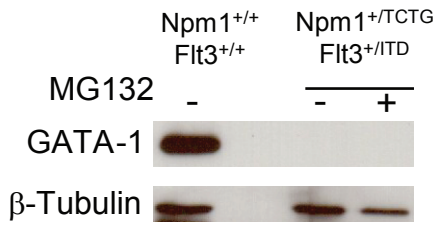**B**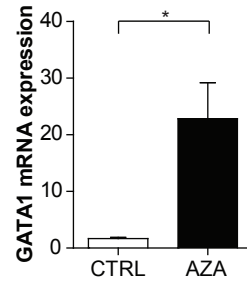**C**

i

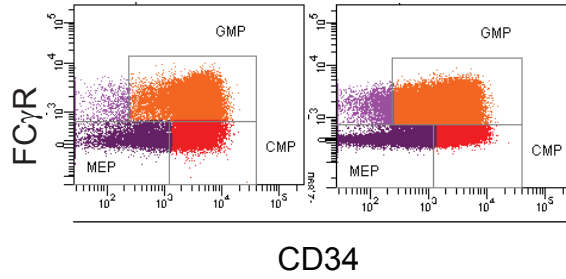

ii

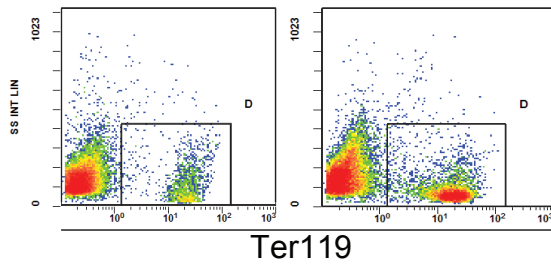

Figure S8: Sportoletti et al.

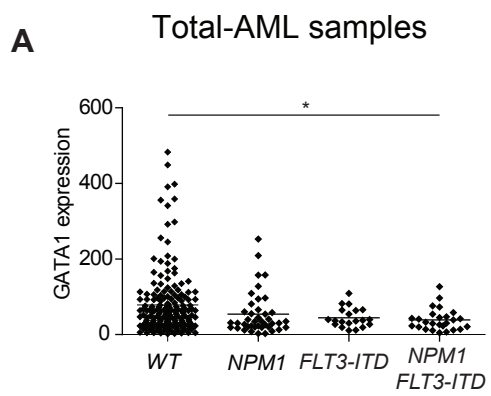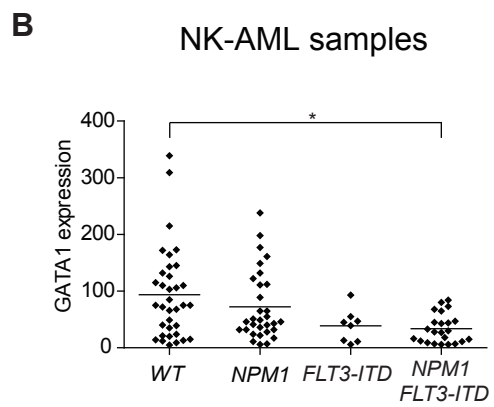

Figure S9: Sportoletti et al.



|          |         |            |          |  |  |  |  |  |  |  |  |
|----------|---------|------------|----------|--|--|--|--|--|--|--|--|
| Enah     | 284.979 | Rhd        | -608.965 |  |  |  |  |  |  |  |  |
| Dusp22   | 283.811 | Cmah       | -607.644 |  |  |  |  |  |  |  |  |
| Tmem176a | 282.973 | Igk-V8     | -603.192 |  |  |  |  |  |  |  |  |
| Kdm5d    | 103.697 | Gypa       | -587.857 |  |  |  |  |  |  |  |  |
| Abcb1b   | 34.169  | Fcer2a     | -583.047 |  |  |  |  |  |  |  |  |
| Cd34     | 30.799  | Oas1g      | -580.198 |  |  |  |  |  |  |  |  |
| Cd209c   | 28.731  | Zfpm1      | -579.963 |  |  |  |  |  |  |  |  |
| Uty      | 16.437  | Cd22       | -573.019 |  |  |  |  |  |  |  |  |
|          |         | Tspan33    | -569.515 |  |  |  |  |  |  |  |  |
|          |         | Paqr9      | -564.136 |  |  |  |  |  |  |  |  |
|          |         | Gfi1b      | -563.572 |  |  |  |  |  |  |  |  |
|          |         | Hemgn      | -555.876 |  |  |  |  |  |  |  |  |
|          |         | S1pr1      | -545.576 |  |  |  |  |  |  |  |  |
|          |         | Blk        | -540.033 |  |  |  |  |  |  |  |  |
|          |         | Sptb       | -535.097 |  |  |  |  |  |  |  |  |
|          |         | Slamf6     | -533.604 |  |  |  |  |  |  |  |  |
|          |         | Btn110     | -529.937 |  |  |  |  |  |  |  |  |
|          |         | Cr2        | -518.154 |  |  |  |  |  |  |  |  |
|          |         | Igkv15-103 | -514.258 |  |  |  |  |  |  |  |  |
|          |         | Igkv14-126 | -507.943 |  |  |  |  |  |  |  |  |
|          |         | Tmem56     | -505.151 |  |  |  |  |  |  |  |  |
|          |         | Add2       | -496.229 |  |  |  |  |  |  |  |  |
|          |         | Blvrb      | -492.371 |  |  |  |  |  |  |  |  |
|          |         | Cd79b      | -491.904 |  |  |  |  |  |  |  |  |
|          |         | Cyp2r1     | -487.641 |  |  |  |  |  |  |  |  |
|          |         | Igkv1-133  | -485.448 |  |  |  |  |  |  |  |  |
|          |         | Fcrla      | -484.977 |  |  |  |  |  |  |  |  |
|          |         | Igkv6-14   | -471.498 |  |  |  |  |  |  |  |  |
|          |         | Ighv1-61   | -467.061 |  |  |  |  |  |  |  |  |
|          |         | Cpox       | -465.465 |  |  |  |  |  |  |  |  |
|          |         | Igh-V11    | -462.097 |  |  |  |  |  |  |  |  |
|          |         | Ahsp       | -457.493 |  |  |  |  |  |  |  |  |
|          |         | Asprv1     | -457.493 |  |  |  |  |  |  |  |  |
|          |         | Ighv1-62   | -454.098 |  |  |  |  |  |  |  |  |
|          |         | Igk-V28    | -449.261 |  |  |  |  |  |  |  |  |
|          |         | Atp1b2     | -445.944 |  |  |  |  |  |  |  |  |
|          |         | Atp1b1     | -444.398 |  |  |  |  |  |  |  |  |

|  |  |               |          |  |  |  |  |  |  |  |  |
|--|--|---------------|----------|--|--|--|--|--|--|--|--|
|  |  | Trib2         | -430.362 |  |  |  |  |  |  |  |  |
|  |  | Bach2         | -429.619 |  |  |  |  |  |  |  |  |
|  |  | Chst3         | -427.617 |  |  |  |  |  |  |  |  |
|  |  | Ighv1-54      | -425.035 |  |  |  |  |  |  |  |  |
|  |  | Gdpd1         | -424.958 |  |  |  |  |  |  |  |  |
|  |  | Mfsd2b        | -423.806 |  |  |  |  |  |  |  |  |
|  |  | Cdc42bpa      | -416.666 |  |  |  |  |  |  |  |  |
|  |  | Tspo2         | -416.645 |  |  |  |  |  |  |  |  |
|  |  | Epb42         | -415.387 |  |  |  |  |  |  |  |  |
|  |  | Epor          | -415.143 |  |  |  |  |  |  |  |  |
|  |  | Aldh1a7       | -411.238 |  |  |  |  |  |  |  |  |
|  |  | Slc22a23      | -405.529 |  |  |  |  |  |  |  |  |
|  |  | Spire1        | -402.132 |  |  |  |  |  |  |  |  |
|  |  | 5430401H09Rik | -400.369 |  |  |  |  |  |  |  |  |
|  |  | Myo1d         | -397.792 |  |  |  |  |  |  |  |  |
|  |  | Slc43a1       | -394.622 |  |  |  |  |  |  |  |  |
|  |  | D13Ert608e    | -394.302 |  |  |  |  |  |  |  |  |
|  |  | Igkv1-135     | -391.675 |  |  |  |  |  |  |  |  |
|  |  | Ighv1-19      | -389.262 |  |  |  |  |  |  |  |  |
|  |  | Fam129c       | -386.723 |  |  |  |  |  |  |  |  |
|  |  | Tmem120b      | -386.333 |  |  |  |  |  |  |  |  |
|  |  | Slc4a1        | -383.228 |  |  |  |  |  |  |  |  |
|  |  | Gata1         | -378.518 |  |  |  |  |  |  |  |  |
|  |  | Lef1          | -376.188 |  |  |  |  |  |  |  |  |
|  |  | Igkv9-120     | -373.911 |  |  |  |  |  |  |  |  |
|  |  | Ralgps2       | -373.095 |  |  |  |  |  |  |  |  |
|  |  | Slc40a1       | -372.447 |  |  |  |  |  |  |  |  |
|  |  | Ighm          | -371.914 |  |  |  |  |  |  |  |  |
|  |  | Nfia          | -371.534 |  |  |  |  |  |  |  |  |
|  |  | Myh10         | -370.861 |  |  |  |  |  |  |  |  |
|  |  | Cd2           | -366.438 |  |  |  |  |  |  |  |  |
|  |  | Igh-VJ558     | -365.404 |  |  |  |  |  |  |  |  |
|  |  | Gzma          | -362.403 |  |  |  |  |  |  |  |  |
|  |  | Chchd10       | -362.285 |  |  |  |  |  |  |  |  |
|  |  | Cd55          | -361.105 |  |  |  |  |  |  |  |  |
|  |  | Alad          | -360.122 |  |  |  |  |  |  |  |  |
|  |  | Trim30d       | -359.984 |  |  |  |  |  |  |  |  |

|  |           |          |  |  |  |  |  |  |  |  |
|--|-----------|----------|--|--|--|--|--|--|--|--|
|  | Bank1     | -359.755 |  |  |  |  |  |  |  |  |
|  | Trim10    | -359.188 |  |  |  |  |  |  |  |  |
|  | Chil5     | -357.862 |  |  |  |  |  |  |  |  |
|  | Igkv1-117 | -353.472 |  |  |  |  |  |  |  |  |
|  | Igkv8-30  | -353.127 |  |  |  |  |  |  |  |  |
|  | Gdf3      | -352.374 |  |  |  |  |  |  |  |  |
|  | Il1f9     | -351.122 |  |  |  |  |  |  |  |  |
|  | Slc6a20a  | -350.745 |  |  |  |  |  |  |  |  |
|  | Igkv4-70  | -350.324 |  |  |  |  |  |  |  |  |
|  | Tcrb-J    | -348.952 |  |  |  |  |  |  |  |  |
|  | Ighv10-3  | -345.699 |  |  |  |  |  |  |  |  |
|  | Il1rl1    | -345.313 |  |  |  |  |  |  |  |  |
|  | Gimap6    | -344.146 |  |  |  |  |  |  |  |  |
|  | Tom111    | -341.951 |  |  |  |  |  |  |  |  |
|  | Dennd5b   | -341.618 |  |  |  |  |  |  |  |  |
|  | Tfr2      | -337.752 |  |  |  |  |  |  |  |  |
|  | Gstm5     | -337.505 |  |  |  |  |  |  |  |  |
|  | Ighv1-53  | -337.236 |  |  |  |  |  |  |  |  |
|  | Iglv1     | -336.275 |  |  |  |  |  |  |  |  |
|  | Sec14l2   | -335.892 |  |  |  |  |  |  |  |  |
|  | Crip2     | -333.482 |  |  |  |  |  |  |  |  |
|  | Igkv9-129 | -333.179 |  |  |  |  |  |  |  |  |
|  | Rag2      | -333.168 |  |  |  |  |  |  |  |  |
|  | Gpr174    | -332.829 |  |  |  |  |  |  |  |  |
|  | Igkv4-72  | -332.716 |  |  |  |  |  |  |  |  |
|  | Sox6      | -332.069 |  |  |  |  |  |  |  |  |
|  | Iglv2     | -326.119 |  |  |  |  |  |  |  |  |
|  | Hmbs      | -325.256 |  |  |  |  |  |  |  |  |
|  | Agtr1a    | -319.422 |  |  |  |  |  |  |  |  |
|  | Npy       | -319.108 |  |  |  |  |  |  |  |  |
|  | Rasgrp3   | -313.834 |  |  |  |  |  |  |  |  |
|  | Ammecr1   | -312.093 |  |  |  |  |  |  |  |  |
|  | Ntn4      | -311.162 |  |  |  |  |  |  |  |  |
|  | Ighv9-4   | -309.807 |  |  |  |  |  |  |  |  |
|  | Chil1     | -308.504 |  |  |  |  |  |  |  |  |
|  | Serinc5   | -308.482 |  |  |  |  |  |  |  |  |
|  | Plpp1     | -303.489 |  |  |  |  |  |  |  |  |

|  |              |          |  |  |  |  |  |  |  |  |
|--|--------------|----------|--|--|--|--|--|--|--|--|
|  | Gbp8         | -303.091 |  |  |  |  |  |  |  |  |
|  | Igk-V4       | -301.601 |  |  |  |  |  |  |  |  |
|  | Gpc4         | -301.236 |  |  |  |  |  |  |  |  |
|  | Igkv4-55     | -298.149 |  |  |  |  |  |  |  |  |
|  | Cd300ld      | -298.083 |  |  |  |  |  |  |  |  |
|  | Ly6g         | -297.405 |  |  |  |  |  |  |  |  |
|  | Gbp4         | -296.996 |  |  |  |  |  |  |  |  |
|  | Stard10      | -296.342 |  |  |  |  |  |  |  |  |
|  | Sdc4         | -295.951 |  |  |  |  |  |  |  |  |
|  | Tspan13      | -295.166 |  |  |  |  |  |  |  |  |
|  | Gfra2        | -294.434 |  |  |  |  |  |  |  |  |
|  | Igkv8-19     | -294.068 |  |  |  |  |  |  |  |  |
|  | Igh-VX24     | -291.912 |  |  |  |  |  |  |  |  |
|  | Fhdc1        | -290.883 |  |  |  |  |  |  |  |  |
|  | Cyth3        | -290.774 |  |  |  |  |  |  |  |  |
|  | Igh-V7183    | -290.682 |  |  |  |  |  |  |  |  |
|  | Cd59a        | -289.759 |  |  |  |  |  |  |  |  |
|  | St6gal1      | -288.029 |  |  |  |  |  |  |  |  |
|  | Ighv6-6      | -286.839 |  |  |  |  |  |  |  |  |
|  | Xrcc5        | -285.957 |  |  |  |  |  |  |  |  |
|  | Bex4         | -283.822 |  |  |  |  |  |  |  |  |
|  | Egr1         | -264.866 |  |  |  |  |  |  |  |  |
|  | St3gal6      | -243.159 |  |  |  |  |  |  |  |  |
|  | Cd79a        | -242.786 |  |  |  |  |  |  |  |  |
|  | Klk1         | -239.883 |  |  |  |  |  |  |  |  |
|  | Ms4a1        | -225.907 |  |  |  |  |  |  |  |  |
|  | Siglech      | -222.076 |  |  |  |  |  |  |  |  |
|  | LOC102642252 | -218.101 |  |  |  |  |  |  |  |  |
|  | Ifi214       | -215.567 |  |  |  |  |  |  |  |  |
|  | Igk          | -214.573 |  |  |  |  |  |  |  |  |
|  | Pla2g4c      | -212.637 |  |  |  |  |  |  |  |  |
|  | Mir144       | -211.178 |  |  |  |  |  |  |  |  |
|  | Ebf1         | -202.502 |  |  |  |  |  |  |  |  |
|  | Cecr2        | -186.327 |  |  |  |  |  |  |  |  |
|  | Pax5         | -151.839 |  |  |  |  |  |  |  |  |
|  | Slc25a21     | -149.487 |  |  |  |  |  |  |  |  |
|  | Fcmr         | -141.977 |  |  |  |  |  |  |  |  |

|  |  |          |          |  |  |  |  |  |  |  |  |
|--|--|----------|----------|--|--|--|--|--|--|--|--|
|  |  | Ermap    | -139.845 |  |  |  |  |  |  |  |  |
|  |  | Car1     | -139.336 |  |  |  |  |  |  |  |  |
|  |  | Ces2g    | -121.883 |  |  |  |  |  |  |  |  |
|  |  | Pkhd111  | -120.679 |  |  |  |  |  |  |  |  |
|  |  | Rac1     | -113.331 |  |  |  |  |  |  |  |  |
|  |  | Scd1     | -110.097 |  |  |  |  |  |  |  |  |
|  |  | Gm15915  | -109.289 |  |  |  |  |  |  |  |  |
|  |  | Xist     | -109.029 |  |  |  |  |  |  |  |  |
|  |  | Igkv4-53 | -104.692 |  |  |  |  |  |  |  |  |
|  |  | Gm32819  | -94.442  |  |  |  |  |  |  |  |  |
|  |  | Aldh1a1  | -75.918  |  |  |  |  |  |  |  |  |
|  |  | Tspan8   | -70.562  |  |  |  |  |  |  |  |  |
|  |  | Cpm      | -64.355  |  |  |  |  |  |  |  |  |
|  |  | Reep6    | -54.164  |  |  |  |  |  |  |  |  |
|  |  | Cacna1e  | -52.544  |  |  |  |  |  |  |  |  |
|  |  | Cd38     | -51.526  |  |  |  |  |  |  |  |  |
|  |  | Cd51     | -39.083  |  |  |  |  |  |  |  |  |
|  |  | BE692007 | -36.643  |  |  |  |  |  |  |  |  |
|  |  | Zdhhc14  | 36.523   |  |  |  |  |  |  |  |  |
|  |  | Asb17os  | -33.787  |  |  |  |  |  |  |  |  |
|  |  | Mns1     | -32.348  |  |  |  |  |  |  |  |  |
|  |  | Atp7b    | -29.788  |  |  |  |  |  |  |  |  |
|  |  | Igkv3-4  | -29.137  |  |  |  |  |  |  |  |  |
|  |  | Traf4    | -28.918  |  |  |  |  |  |  |  |  |
|  |  | Abcg4    | -26.861  |  |  |  |  |  |  |  |  |
|  |  | Aff2     | -34.532  |  |  |  |  |  |  |  |  |
|  |  | Nckap1   | -28.961  |  |  |  |  |  |  |  |  |

**Table S1. List of differentially expressed genes and relative values in the bone marrow of *Npm1*<sup>TCTG/TCTG</sup>;*Flt3*<sup>+/ITD</sup>; *Npm1*<sup>TCTG/TCTG</sup>;*Flt3*<sup>+/+</sup> and *Flt3*<sup>+/ITD</sup>, compared to *Npm1*<sup>+/+</sup>;*Flt3*<sup>+/+</sup> Wild type control.**



***Npm1<sup>TCTG/TCTG</sup>;Flt3<sup>ITD</sup>***

| <b>DOWN</b>   | <b>values</b> | <b>UP</b> | <b>values</b> |
|---------------|---------------|-----------|---------------|
| Gdf3          | -886,604      | Nov       | 353,3368      |
| Blk           | -873,292      | Adgrg5    | 21,38727      |
| Slc4a1        | -285,161      | Plxdc2    | 12,90118      |
| Aldh1a1       | -282,301      | Cp        | 12,19327      |
| Tspan8        | -275,819      | Igfbp7    | 10,89965      |
| Igkv9-129     | -230,698      | Tmem178   | 8,850796      |
| Btnl10        | -217,773      | Cd209c    | 7,352113      |
| Paqr9         | -212,663      | Kcnq3     | 6,871774      |
| Cd19          | -206,606      | Enah      | 6,716575      |
| Trim10        | -201,191      | BC064078  | 5,372653      |
| Epor          | -163,395      | Cd209a    | 4,694917      |
| Rhd           | -158,456      | Rasgrf2   | 4,509685      |
| Sptb          | -150,067      | Ifi205    | 3,803583      |
| Add2          | -145,859      | Clec4b1   | 3,668178      |
| Trib2         | -143,066      | S100a4    | 3,162371      |
| Tspo2         | -136,672      | Sulf2     | 2,724305      |
| A730089K16Rik | -132,47       | Wfdc17    | 2,663991      |
| Igkv15-103    | -120,003      | Qpct      | 2,494077      |
| Ermap         | -119,087      | Pid1      | 2,489407      |
| Ank1          | -116,077      | Dusp22    | 2,431463      |
| Igkv4-55      | -111,959      | Klrb1f    | 2,427726      |
| Gypa          | -103,248      | Egr1      | 2,422851      |
| Spta1         | -101,581      | Itga1     | 2,407483      |
| Gpc4          | -99,7659      | Olfm1     | 2,160244      |
| Pkhd11        | -95,0268      | Klk1      | 2,102996      |
| Rhag          | -91,162       | Abcb1b    | 2,099031      |
| Redrum        | -90,2244      | Fabp5     | 2,087197      |
| Cldn13        | -88,929       | Hoxa9     | 2,075765      |
| Asb17os       | -87,9272      | Shtn1     | 1,914062      |
| Igkv1-133     | -86,3035      | Ccr2      | 1,704657      |
| Pax5          | -78,4597      | Il6st     | 1,659123      |
| Car1          | -78,4097      | Nrg1      | 1,599928      |
| Slc38a5       | -76,9679      | Bach2     | 1,595562      |
| Igkv9-120     | -70,4622      | Rac1      | 1,428006      |
| Igkv3-4       | -67,8365      | Bex6      | 1,416588      |
| Ms4a1         | -67,5753      | Cfh       | 1,341099      |
| Slc25a21      | -66,0792      | Tmem176a  | 1,2806        |
| Agtr1a        | -64,1694      | Uty       | 1,21077       |
| Pklr          | -62,0641      | Eif2s3y   | 1,146226      |
| Gata1         | -61,9127      |           |               |
| Kel           | -58,0389      |           |               |
| Tmem56        | -56,4067      |           |               |
| Klf1          | -55,0319      |           |               |

|          |          |  |  |
|----------|----------|--|--|
| Sec14l2  | -52,1195 |  |  |
| Aldh1a7  | -50,3731 |  |  |
| Cr2      | -47,5868 |  |  |
| Ces2g    | -44,0827 |  |  |
| Aqp1     | -43,3569 |  |  |
| Abcg4    | -41,9547 |  |  |
| Sox6     | -41,0053 |  |  |
| Ighv1-53 | -37,8551 |  |  |
| Fcmr     | -37,5665 |  |  |
| Igkv4-70 | -37,5207 |  |  |
| Bex4     | -35,0058 |  |  |
| Mfsd2b   | -34,7841 |  |  |
| Ighg3    | -34,7053 |  |  |
| Ebf1     | -33,3863 |  |  |
| Cd5l     | -30,6045 |  |  |
| Igkv6-14 | -28,8325 |  |  |
| Cd2      | -28,554  |  |  |
| Hemgn    | -27,4618 |  |  |
| Cecr2    | -27,1872 |  |  |
| Gm15915  | -26,9538 |  |  |
| Iglv1    | -25,9822 |  |  |
| Ighv1-12 | -25,8761 |  |  |
| Nxpe2    | -23,7896 |  |  |
| Igkv4-72 | -22,4887 |  |  |
| Cd79a    | -21,6583 |  |  |
| Pou2af1  | -21,6428 |  |  |
| Ntn4     | -20,6278 |  |  |
| Aff2     | -20,5824 |  |  |
| Vpreb3   | -20,472  |  |  |
| Igkv8-30 | -20,3078 |  |  |
| Slc6a20a | -20,2492 |  |  |
| Myo1d    | -19,8785 |  |  |
| Ighv1-62 | -17,9152 |  |  |
| Ighv1-61 | -17,843  |  |  |
| Ikzf3    | -17,6947 |  |  |
| Asprv1   | -16,8825 |  |  |
| S1pr1    | -16,7871 |  |  |
| Mt2      | -16,5731 |  |  |
| Cyp2r1   | -15,9097 |  |  |
| Cpm      | -15,7081 |  |  |
| Car2     | -14,8477 |  |  |
| Ighv6-6  | -14,5382 |  |  |
| Ighm     | -14,2451 |  |  |
| Igkv4-53 | -13,3716 |  |  |
| Fhdc1    | -13,2208 |  |  |
| Fcrla    | -12,9398 |  |  |

|            |          |  |  |
|------------|----------|--|--|
| Il7r       | -12,6937 |  |  |
| Igkv1-135  | -12,319  |  |  |
| Igkv8-19   | -11,8922 |  |  |
| Ctse       | -11,8033 |  |  |
| Oas1g      | -11,4272 |  |  |
| Gpr174     | -11,3469 |  |  |
| Cmah       | -10,944  |  |  |
| Chst3      | -10,8013 |  |  |
| Lef1       | -10,7708 |  |  |
| Ighv1-54   | -10,5236 |  |  |
| Ly6d       | -10,4556 |  |  |
| Ighv10-3   | -10,4487 |  |  |
| Iglv2      | -9,7884  |  |  |
| Igkv6-23   | -9,2602  |  |  |
| Myh10      | -9,08603 |  |  |
| Dennd5b    | -8,9803  |  |  |
| Sdc4       | -8,51107 |  |  |
| Gdpd1      | -8,44204 |  |  |
| Ighv1-19   | -8,33283 |  |  |
| Blnk       | -8,22205 |  |  |
| Dntt       | -8,10243 |  |  |
| St3gal6    | -8,03111 |  |  |
| Atp7b      | -7,88364 |  |  |
| St6gal1    | -7,779   |  |  |
| Zfpm1      | -7,70573 |  |  |
| Cd38       | -7,05817 |  |  |
| Igkv1-117  | -6,95727 |  |  |
| Slc40a1    | -6,38227 |  |  |
| Gbp4       | -6,35128 |  |  |
| Igkv14-126 | -6,10648 |  |  |
| Akap12     | -5,95145 |  |  |
| Cd55       | -5,83077 |  |  |
| Rag2       | -5,57938 |  |  |
| Abcb4      | -5,47232 |  |  |
| Bank1      | -5,35467 |  |  |
| Atp1b2     | -5,30655 |  |  |
| Chil5      | -4,93554 |  |  |
| Tom1l1     | -4,89053 |  |  |
| Il1f9      | -4,85467 |  |  |
| Cacna1e    | -4,68883 |  |  |
| Xrcc5      | -4,66601 |  |  |
| Cd59a      | -4,61453 |  |  |
| Blvrb      | -4,53239 |  |  |
| Cd300ld    | -4,49322 |  |  |
| Ighv9-4    | -4,39605 |  |  |
| Siglech    | -4,315   |  |  |

|          |          |  |  |
|----------|----------|--|--|
| Tmem120b | -4,18559 |  |  |
| Gfi1b    | -4,17193 |  |  |
| Tfr2     | -4,07557 |  |  |
| BE692007 | -4,05131 |  |  |
| Atp1b1   | -3,67232 |  |  |
| Reep6    | -3,5998  |  |  |
| Slc43a1  | -3,52854 |  |  |
| Gstm5    | -3,5126  |  |  |
| Chil1    | -3,50414 |  |  |
| Ly6g     | -3,40398 |  |  |
| Cpox     | -3,28971 |  |  |
| Igll1    | -3,21557 |  |  |
| Gimap6   | -3,14347 |  |  |
| Gbp8     | -3,133   |  |  |
| Nckap1   | -3,1036  |  |  |
| Slamf6   | -2,9528  |  |  |
| Pla2g4c  | -2,94508 |  |  |
| Ralgs2   | -2,72054 |  |  |
| Cdc42bpa | -2,7131  |  |  |
| Cd72     | -2,65915 |  |  |
| Alad     | -2,62918 |  |  |
| Gzma     | -2,58262 |  |  |
| Hmbs     | -2,48448 |  |  |
| Gfra2    | -2,41796 |  |  |
| Tspan33  | -2,28007 |  |  |
| Vcan     | -2,15794 |  |  |
| Stard10  | -2,15592 |  |  |
| Rasgrp3  | -1,99385 |  |  |
| Gpnmb    | -1,97158 |  |  |
| Nfia     | -1,96779 |  |  |
| Cd22     | -1,92221 |  |  |
| Trim30d  | -1,92031 |  |  |
| Chchd10  | -1,88921 |  |  |
| Spib     | -1,88421 |  |  |
| Traf4    | -1,84977 |  |  |
| Ammecr1  | -1,84632 |  |  |
| Cd79b    | -1,82618 |  |  |
| Tspan13  | -1,71759 |  |  |
| Zdhhc14  | -1,69435 |  |  |
| Slc22a23 | -1,68204 |  |  |
| Crip2    | -1,68132 |  |  |
| Spire1   | -1,67791 |  |  |
| Fcer2a   | -1,62478 |  |  |
| Serinc5  | -1,57831 |  |  |
| Il1r1    | -1,49619 |  |  |
| Mboat2   | -1,49484 |  |  |

|             |          |  |  |
|-------------|----------|--|--|
| D13Ertd608e | -1,49095 |  |  |
| Scd1        | -1,40765 |  |  |
| Cd34        | -1,39916 |  |  |
| Cyth3       | -1,37303 |  |  |
| Mns1        | -1,33454 |  |  |
| Rnase2a     | -1,32368 |  |  |
| Fam129c     | -1,24192 |  |  |
| Trim12a     | -1,20898 |  |  |
| Xist        | -1,05052 |  |  |
| Kdm5d       | -1,03279 |  |  |

**Table S2. List of differentially expressed genes and relative values in the Lineage negative bone marrow cells of *Npm1*<sup>TCTG/TCTG</sup>;*Flt3*<sup>+/ITD</sup>; compared to Wild type control.**
